# Supplementary material
Source: PubMed Central journal article supplement (PMC9348259)

**A**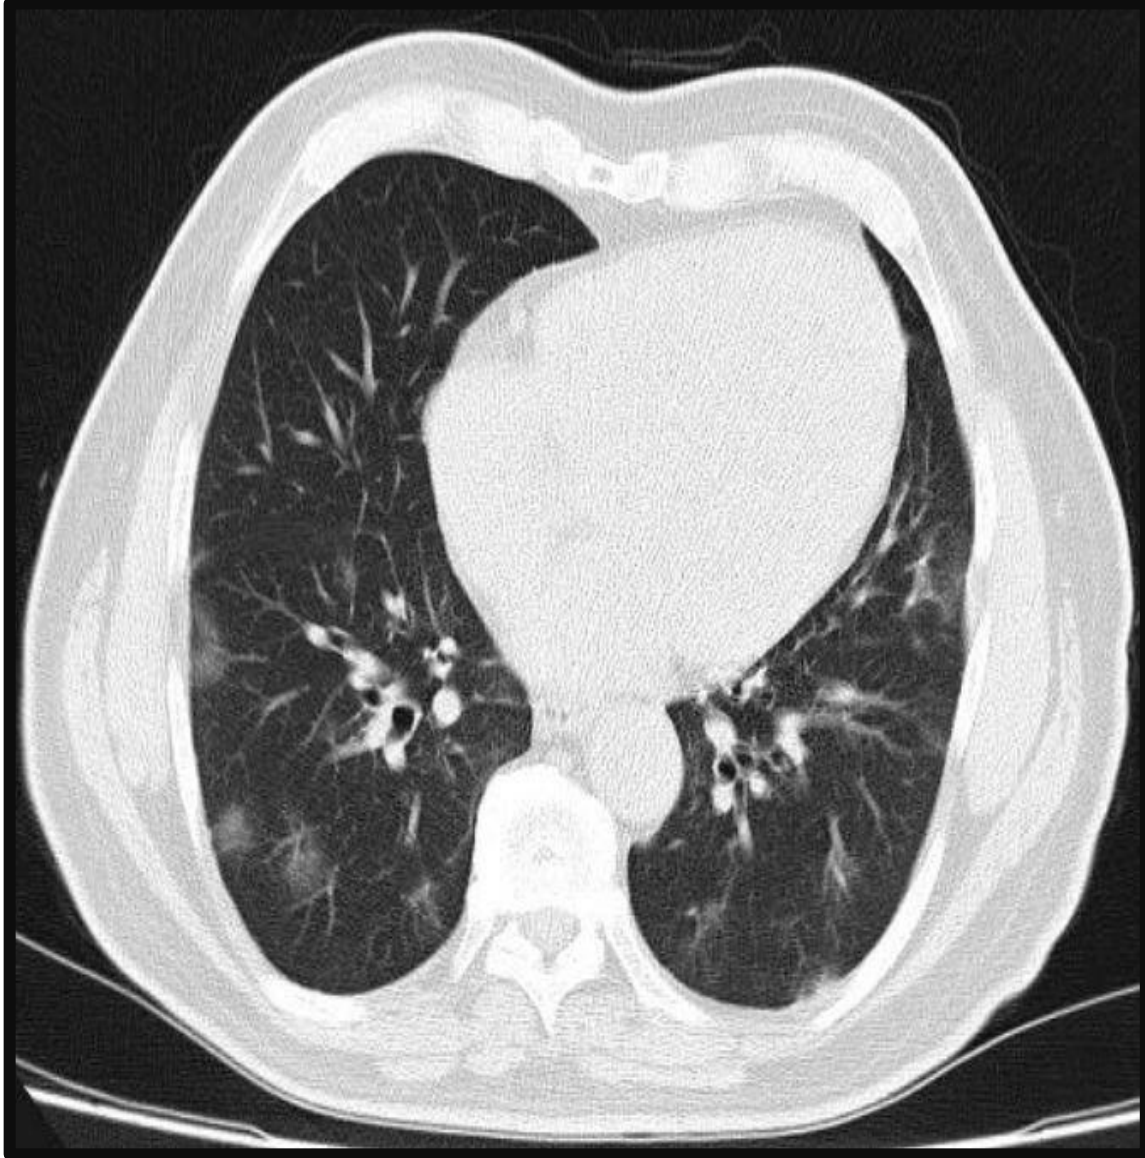**B**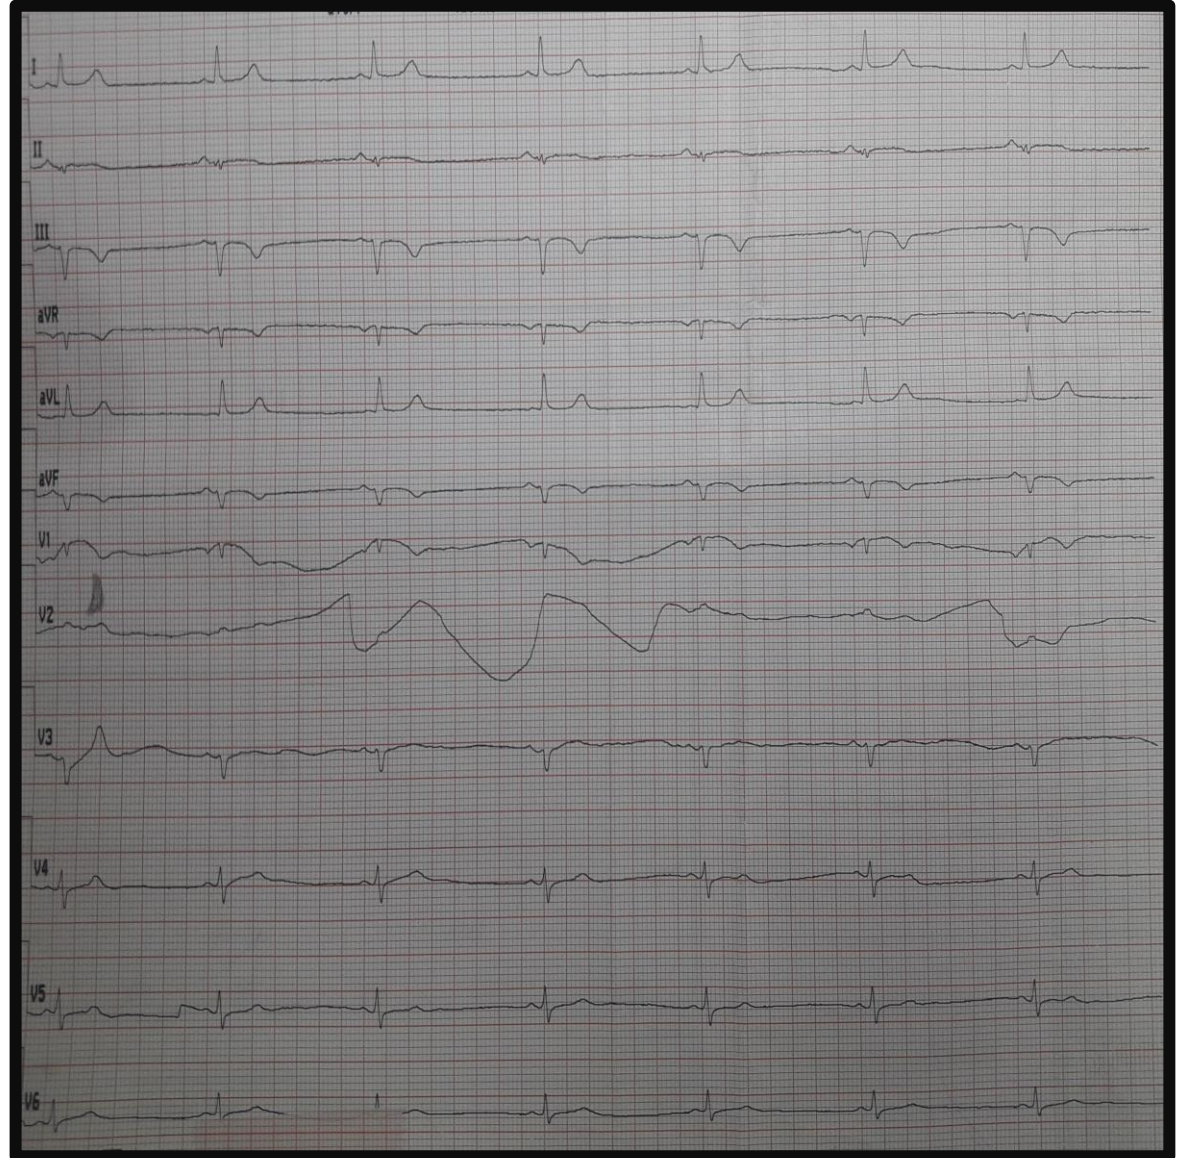

Supplement: JMV-94-3783-s001.pdf [file JMV-94-3783-s001.pdf]
